# Supplementary material for: The Development of Future Orientation is Associated with Faster Decline in Hopelessness during Adolescence
Source: Springer Nature journal article supplement (doi:10.1007/s10964-017-0803-4), 2018-01-05
Supplement: MOESM3 [file 15347376]

| Supplementary Table 2. Model fit information for estimated parallel process growth models that includes stressful childhood life events as a covariate | | | | | | | | |
| --- | --- | --- | --- | --- | --- | --- | --- | --- |
|  | AFC | | PA | | TP | | Total | |
| **Step 1: Baseline Models** | | | | | | | | |
| χ2 (*df* =65) | 110.017* | | 92.058* | | 89.343* | | 116.084* | |
| CFI | 0.901 | | 0.951 | | 0.943 | | 0.922 | |
|  | *Est.* | *90% CI* | *Est.* | *90% CI* | *Est.* | *90% CI* | *Est.* | *90% CI* |
| RMSEA | 0.034 | (0.023, 0.045) | 0.027 | (0.012, 0.039) | 0.025 | (0.010, 0.038) | 0.037 | (0.026, 0.047) |
| **Step 2: Prospective Hopelessness to Future Orientation** | | | | | | | | |
| χ2 (*df* =55) | 105.405** | | 77.613 ꝉ | | 80.198 ꝉ | | 106.731** | |
| CFI | 0.903 | | **0.970** | | **0.955** | | 0.930 | |
|  | *Est.* | *90% CI* | *Est.* | *90% CI* | *Est.* | *90% CI* | *Est.* | *90% CI* |
| RMSEA | 0.035 | (0.024, 0.047) | 0.022 | (0.000, 0.035) | 0.023 | (0.000, 0.036) | 0.036 | (0.024, 0.047) |
|  | ***Equality Constraints Applied*** | | | | | | | |
| χ2 (*df* =58) | 109.538** | | 89.729* | | 84.855* | | 112.007** | |
| CFI | 0.900 | | 0.954 | | 0.951 | | 0.927 | |
|  | *Est.* | *90% CI* | *Est.* | *90% CI* | *Est.* | *90% CI* | *Est.* | *90% CI* |
| RMSEA | 0.035 | (0.023, 0.046) | 0.026 | (0.011, 0.038) | 0.024 | (0.005, 0.031) | 0.036 | (0.025, 0.047) |
| **Step 3: Prospective Future Orientation to Hopelessness** | | | | | | | | |
| χ2 (*df* =55) | 105.024** | | 90.159* | | 86.029* | | 111.992** | |
| CFI | 0.903 | | 0.947 | | 0.941 | | 0.922 | |
|  | *Est.* | *90% CI* | *Est.* | *90% CI* | *Est.* | *90% CI* | *Est.* | *90% CI* |
| RMSEA | 0.035 | (0.023, 0.046) | 0.029 | (0.015, 0.041) | 0.027 | (0.011, 0.039) | 0.038 | (0.027, 0.049) |
|  | ***Equality Constraints Applied*** | | | | | | | |
| χ2 (*df* =61) | 108.888** | | 91.578* | | 88.842* | | 115.392** | |
| CFI | 0.902 | | 0.950 | | 0.941 | | 0.922 | |
|  | *Est.* | *90% CI* | *Est.* | *90% CI* | *Est.* | *90% CI* | *Est.* | *90% CI* |
| RMSEA | 0.035 | (0.023, 0.046) | 0.027 | (0.013, 0.039) | 0.026 | (0.010, 0.038) | 0.037 | (0.026, 0.048) |
| **Step 4: Hopelessness to Future Orientation *and* Future Orientation to Hopelessness** | | | | | | | | |
| χ2 (*df* =57) | 100.652** | | 75.358ꝉ | | 78.024* | | 102.388* | |
| CFI | 0.904 | | **0.967** | | 0.950 | | 0.931 | |
|  | *Est.* | *90% CI* | *Est.* | *90% CI* | *Est.* | *90% CI* | *Est.* | *90% CI* |
| RMSEA | 0.036 | (0.024, 0.048) | 0.024 | (0.000, 0.037) | 0.025 | (0.007, 0.038) | 0.037 | (0.025, 0.048) |
|  | ***Equality Constraints Applied*** | | | | | | | |
| χ2 (*df* =57) | 108.470* | | 89.254* | | 84.452* | | 111.364** | |
| CFI | 0.900 | | 0.953 | | 0.949 | | 0.926 | |
|  | *Est.* | *90% CI* | *Est.* | *90% CI* | *Est.* | *90% CI* | *Est.* | *90% CI* |
| RMSEA | 0.035 | (0.024, 0.046) | 0.027 | (0.012, 0.039) | 0.023 | (0.006, 0.037) | 0.036 | (0.025, 0.047) |
| Parameters in bold are substantially different from baseline models (Δ CFI ≥ .010; Δ RMSEA ≥ .015) CFI =Comparative Fit Index; RMSEA= Root Mean Square Error of Approximation; AFC = Anticipation of Future Consequences; PA = Planning Ahead; TP = Time Perspective  ꝉ*p*< .10; * *p*< .05; ** *p*<.01; | | | | | | | | |
|  | | | | | | | | |
