# Supplementary material for: The Development of Future Orientation is Associated with Faster Decline in Hopelessness during Adolescence
Source: Springer Nature journal article supplement (doi:10.1007/s10964-017-0803-4), 2018-01-05
Supplement: MOESM7 [file 15347376]

| Supplementary Table 6. Parameter Estimates for the four baseline parallel process growth models where negative life events has been included as a covariate. (N = 368) | | | | | | | | | | | | |
| --- | --- | --- | --- | --- | --- | --- | --- | --- | --- | --- | --- | --- |
| **Intercepts** | | AFC | |  | PA | |  | TP | |  | Total | |
|  |  | *Est.* | *SE* |  | *Est.* | *SE* |  | *Est.* | *SE* |  | *Est.* | *SE* |
|  | IHSC | **2.733*** | 1.335 |  | **2.767**** | 1.322 |  | **2.756*** | 1.283 |  | **2.746*** | 1.330 |
|  | SHSC | -0.514 | 0.954 |  | -0.792 | 0.825 |  | -0.853 | 0.864 |  | -0.841 | 0.922 |
|  | IFOS | **2.909**** | 0.423 |  | **3.261**** | 0.469 |  | **1.793**** | 0.436 |  | **2.606**** | 0.339 |
|  | SFOS | -0.055 | 0.244 |  | -0.212 | 0.228 |  | 0.172 | 0.202 |  | -0.112 | 0.187 |
| **Residual Variances** | | | |  |  |  |  |  |  |  |  |  |
|  | IHSC | **1.827**** | 0.459 |  | **1.862**** | 0.462 |  | **1.828**** | 0.469 |  | **1.810**** | 0.461 |
|  | SHSC | 0.135† | 0.067 |  | **0.133*** | 0.068 |  | 0.132† | 0.068 |  | 0.129† | 0.054 |
|  | IFOS | **0.183**** | 0.027 |  | **0.237**** | 0.028 |  | **0.166**** | 0.026 |  | **0.130**** | 0.017 |
|  | SFOS | **0.009**** | 0.003 |  | **0.014**** | 0.003 |  | **0.009**** | 0.003 |  | **0.008**** | 0.002 |
| **Growth Factor Associations** | | | |  |  |  |  |  |  |  |  |  |
| A. | IHSC w IFOS | **-0.198**** | 0.060 |  | **-0.138*** | 0.070 |  | **-0.172**** | 0.056 |  | **-0.170**** | 0.045 |
| B. | SHSC w SFOS | **-0.015**** | 0.006 |  | **-0.016*** | 0.007 |  | -0.013 | 0.008 |  | **-0.014*** | 0.006 |
| C. | SHSC on IHSC | -0.075 | 0.072 |  | -0.074 | 0.067 |  | -0.067 | 0.078 |  | -0.066 | 0.074 |
| D. | SHSC on IFOS | -0.044 | 0.126 |  | 0.022 | 0095 |  | 0.086 | 0.183 |  | 0.033 | 0.153 |
| E. | SFOS on IFOS | -0.070 | 0.045 |  | **-0.082*** | 0.033 |  | -0.063 | 0.045 |  | -0.043 | 0.036 |
| F. | SFOS on IHSC | 0.012 | 0.015 |  | -0.012 | 0.015 |  | -0.009 | 0.013 |  | 0.000 | 0.011 |
| **Regression on Covariates** | | |  |  |  |  |  |  |  |  |  |  |
| *HSC Intercept* | |  |  |  |  |  |  |  |  |  |  |  |
|  | Age | 0.008 | 0.103 |  | 0.006 | 0.102 |  | **0.066*** | 0.033 |  | 0.007 | 0.065 |
|  | Sex | 0.258 | 0.207 |  | 0.253 | 0.207 |  | 0.032 | 0.056 |  | 0.257 | 0.207 |
|  | SES | 0.201 | 0.214 |  | 0.200 | 0.214 |  | -0.044 | 0.057 |  | 0.206 | 0.214 |
| *HSC Slope* | |  |  |  |  |  |  |  |  |  |  |  |
|  | Age | 0.034 | 0.061 |  | 0.041 | 0.059 |  | 0.031 | 0.061 |  | 0.041 | 0.059 |
|  | Sex | 0.034 | 0.079 |  | 0.031 | 0.079 |  | 0.035 | 0.080 |  | 0.034 | 0.080 |
|  | SES | 0.028 | 0.083 |  | 0.023 | 0.082 |  | 0.020 | 0.084 |  | 0.018 | 0.082 |
|  | LEI | **0.023**** | 0.007 |  | **0.024**** | 0.007 |  | **0.024**** | 0.007 |  | **0.023**** | 0.007 |
| *FOS Intercept* | |  |  |  |  |  |  |  |  |  |  |  |
|  | Age | -0.009 | 0.032 |  | -0.049 | 0.036 |  | 0.066* | 0.033 |  | 0.004 | 0.026 |
|  | Sex | 0.002 | 0.059 |  | **0144*** | 0.062 |  | 0.032 | 0.056 |  | 0.055 | 0.046 |
|  | SES | 0.009 | 0.059 |  | 0.032 | 0.064 |  | -0.044 | 0.057 |  | 0.000 | 0.046 |
| *FOS Slope* | |  |  |  |  |  |  |  |  |  |  |  |
|  | Age | 0.023 | 0.014 |  | **0.041**** | 0.013 |  | 0.005 | 0.014 |  | **0.023*** | 0.010 |
|  | Sex | -0.006 | 0.020 |  | 0.027 | 0.022 |  | -0.014 | 0.019 |  | 0.001 | 0.016 |
|  | SES | 0.000 | 0.019 |  | 0.004 | 0.020 |  | 0.022 | 0.019 |  | 0.007 | 0.015 |
|  | LEI | **-0.004*** | 0,002 |  | **-0.004**** | 0.002 |  | 0.001 | 0.002 |  | -0.002† | 0.001 |
| HSC = Hopelessness Scale for Children; FOS = Future Orientation Scale; AFC = Anticipation of Future Consequences; PA = Planning Ahead; TP = Time Perspective; I = Intercept; S = Slope; SES is a binary variable with eligibility for free lunch coded as 1; Sex is a binary variable with female coded as 1  ꝉ p< .10; * p< .05; ** p<.01 | | | | | | | | | | | | |
